# Supplementary material
Source: publisher figshare collection journal article supplement (https://acs.figshare.com/ndownloader/files/24159261)
Supplement: Supplementary file 1 [file 24159261]

## Sheet: Table S6
Table S6. List of proteins identified in the clinical samples and their spectral counts.
Database :	MS20-019_Swissprot_Human_ISL_410545_2020-05-18 (20139 sequences)
Enzyme :	Trypsin - Max missed cleavages: 2
Fixed modifications :	Carbamidomethyl (C)
Variable modifications :	Deamidated (NQ), Oxidation (M)
MS/ MS² mass tol. :	± 5.0 ppm / ± 0.02 Da
Instrument type :	Q Exactive HF
Protein characteristics		Spectral counts with parsimony									Number of peptides with parsimony									Number of peptides without parsimony
Accession	MW (Da)	swab T1	swab T2	swab T3	swab T4	swab T5	swab T6	swab T7	swab T8	swab T9	swab T1	swab T2	swab T3	swab T4	swab T5	swab T6	swab T7	swab T8	swab T9	swab T1	swab T2	swab T3	swab T4	swab T5	swab T6	swab T7	swab T8	swab T9
hCoV-19/Italy/INMI1-isl/2020|EPI_ISL_410545|2020-01-29_N	45598	0	0	0	0	0	0	10	54	0	0	0	0	0	0	0	4	5	0	0	0	0	0	0	0	4	5	0
hCoV-19/Italy/INMI1-isl/2020|EPI_ISL_410545|2020-01-29_M	25358.5	0	0	0	1	0	0	0	0	0	0	0	0	1	0	0	0	0	0	0	0	0	1	0	0	0	0	0
